# Supplementary material
Source: Atypon-hosted journal article supplement (https://catalog.library.nashville.org/Record/CARL0000491104/DownloadSupplementalFile?fileId=29)
Supplement: DownloadSupplementalFile [file DownloadSupplementalFile]

## Belmont-Hillsboro Neighbors, Inc. Records, ca. 1970-ca. 1988

### Collection Summary

**Creator:** Belmont-Hillsboro Neighbors, Inc.

**Title:** Belmont-Hillsboro Neighbors, Inc. Records

**Inclusive Dates:** ca. 1970-ca. 1988

**Summary/Abstract:** A collection of organizational records of Belmont-Hillsboro Neighbors, Inc., including correspondence, photographs, newsletters and topical research files created by the organization. Also includes numerous publications produced by the Metropolitan Government of Nashville and Davidson County. The documentary resources, spanning ca. 1970 through ca. 1988, relate to the organizational leadership and activities of the citizens advocacy group, with information about the Belmont-Hillsboro neighborhood, community development, zoning issues, fair housing, I-440, interracial issues, open housing investment, and other topics.

**Physical Description/Extent:** 4 cu. ft. (10 boxes)

**Series:** I. Publications; II. Topical files; III. Newsletters and Miscellany; IV. Correspondence; V. Photographs.

**Accession Number:** 2002.002

**Language:** English

**Stack Location:** Closed stacks workroom range 5 section 5

**Repository:** Special Collections Division, Nashville Public Library, 615 Church Street, Nashville, TN 37219

### Chronology

- |          |                                                                                                                                                                                                                                           |
|----------|-------------------------------------------------------------------------------------------------------------------------------------------------------------------------------------------------------------------------------------------|
| 1901     | The Belmont Land Company secured a franchise to operate a street railway line along Belmont Boulevard, advancing the development of the area as a "street car suburb."                                                                    |
| 1940s    | The neighborhood suffered a decline common to many older neighborhoods as automobiles replaced the street cars and the suburbs of Nashville continued an outward expansion.                                                               |
| ca. 1955 | The I-440 route was set, in anticipation of the Federal Interstate Program which began in 1956. The idea was to follow the Tennessee Central Railroad right-of-way or the area near it. It happened to be near the city line at the time. |
| 1965     | The United States Department of Housing and Urban Development (HUD), a Cabinet department of the United States government was founded to develop and execute policy on housing and cities.                                                |

- April 1968 Congress passed The Fair Housing Act (Title VIII of the Civil Rights Act of 1968), prohibiting discrimination on the basis of race, color, religion, or national origin.
- ca. 1970 Belmont-Hillsboro Neighbors, Inc. (BHN) was established by local residents whose goals included preservation of the residential character of the neighborhood. As stated in the bylaws, the Belmont-Hillsboro Neighborhood includes the area “bounded by Fairfax and Acklen Avenue on the North, Belmont Boulevard on the East, I-440 on the South, and Hillsboro Road on the West.”
- ca. 1971 Belmont-Hillsboro Neighbors, Inc. began affiliation with National Neighbors, an organization that had grown to more than 175 member groups in 72 cities in the year 1980.
- Oct. 30, 1972 The Steering Committee of Belmont-Hillsboro Neighbors, in its meeting voted to reaffirm the position taken on January 10, 1972, opposing the encroachment of commercial uses upon residential streets and requesting the Metropolitan Planning Commission and the Board of Zoning Appeals to restrict commercial development to properties facing 21<sup>st</sup> Avenue South.
- ca. June 1973 Belmont-Hillsboro Neighbors issued a statement in connection with the hearings of the June 25 meeting of the Metro Council Planning Committee regarding the Metropolitan Charter to place the Urban Services and General Services Districts under a single zoning ordinance nicknamed “COMZO.”
- May 14, 1973 The Steering Committee of Belmont-Hillsboro Neighbors, Inc. voted unanimously to participate as a co-sponsoring group in the Title I “Neighborhood Workshops on Zoning and Land Use Planning.”
- March 11, 1974 A group of 150 people met at Christ the King auditorium in a meeting sponsored by Belmont-Hillsboro Neighbors and the Urban Center of Vanderbilt University, for an open meeting discussion on the technical aspects of the proposed I-440 loop through South Nashville between Franklin Road and Hillsboro Pike.
- June 6-9, 1974 Four neighbors (chairman Carroll Bourg, Janice Burrell, Eleanor Phillips, and Eugene TeSelle) attended the fifth annual conference of National Neighbors in Atlanta.
- ca. May 1975 Belmont-Hillsboro Neighbors was awarded a grant by the Tennessee Committee for the Humanities to do a study of architecture and street design in the neighborhood.

- ca. 1976 Citizens for Better Neighborhoods, a group of citizens exploring alternatives to the proposed I-440, prepared a brochure which was distributed in areas near the right of way. Carroll J. Bourg coordinated the group and Belmont-Hillsboro Neighbors was represented on its steering committee.
- April 24, 1976 A "Special Education Hike," sponsored by the Sierra Club, along the route of the proposed I-440 drew a crowd of about 250 on Earth Day. The participants were informed about animal and plant life in this green belt, the location of projected interchanges, and learned about environmental and social impacts of the proposed interstate, and alternative uses for the land acquired.
- ca. May 3, 1976 Belmont-Hillsboro Neighbors received full 501(c)(3) status from the Internal Revenue Service.
- May 13, 1976 At the Metropolitan Historical Commission's annual Architectural Awards Program, Belmont-Hillsboro Neighbors received the award for neighborhood organizations "for creating viable relationships and recognizing and preserving the best qualities of a neighborhood."
- Oct. 1976 At an informal meeting in May and its annual meeting in October, 1976, Belmont-Hillsboro Neighbors, Inc. voted unanimously to oppose construction of I-440.
- ca. 1977 The Belmont-Hillsboro Neighbors, Inc. organizational structure included a slate of presiding officers, alongside committee chairpersons for 1) Membership and Housing; 2) Governmental Relations and Zoning; 3) Human Resources; 4) I-440; 5) Traffic and Pedestrians; 6) Financial Consultant; and 7) Public Works Liasons.
- Jan. 29, 1977 Tennessee Department of Transportation held the first of five public meetings about the proposed interstate 400. Of approximately 350 in attendance, most of the participants in the public meeting opposed the construction of I-440.
- Feb. 28, 1977 Cindy Brown organized a "Neighborhood Watch" meeting, attended by about forty neighbors on Primrose, Cedar Lane, and Wildwood, with a purpose to work with police detectives to help prevent crime in the area.
- July 11, 1977 The Steering Committee of Belmont-Hillsboro Neighbors, Inc. voted to endorse enthusiastically the petition addressed to the Nashville Board of Realtors and signed by a number of individuals active in groups dedicated to the extension of housing opportunities

to all citizens without discrimination.

- Sept. 1977      The Sixth Annual Neighborhood Fair was held at Cedar Lane at Hillsboro Road. Music ranged from bluegrass to classical, with arts and crafts and children's entertainment events.
- Oct. 24, 1977    The annual meeting of BHN was held at Christ the King School. There were reports on various accomplishments during the year: zoning and codes enforcement, opposition to I-440 and exploration of alternatives, stimulation of block activities, and cooperation with other neighborhood organizations. A special feature of the meeting was a slide show jointly planned by four neighborhood organizations featuring homes and renovation efforts.
- 1978            The slate of new officers for the year, elected by the BHN Steering Committee, include Roger Johnson, President; Kathy Guest, Vice-President; Liz Poitras, Recording Secretary; and Ann Bowman, Corresponding Secretary and Treasurer.
- Oct. 9, 1978    At the BHN annual meeting, the membership heard reports from committees and previewed an alternative to I-440 prepared by "Citizens for Better Neighborhoods."
- 1978            At the height of the "second energy crisis" of the Seventies, neighbor Debby Gould organizes a homeowner workshop on energy conservation at Christ the King School, sponsored by the Tennessee Energy Extension Service.
- 1979            The slate of new officers for the year, elected by the BHN Steering Committee, include Kathy Guest, President; Dave McWhirter, Vice-President; June Williams, Recording Secretary; and Jimmie Lynn Ramsaur, Corresponding Secretary and Treasurer.
- Apr. 21, 1980    Citizens for Better Neighborhoods organized a press conference at the Legislative Plaza, as part of a nationwide campaign by CONTACT to highlight the need for "energy independence" and better public transportation; Bill Myers was delegated by BHN to speak for the organization. The next day, which was Earth Day, there was a picnic on the I-440 right of way.
- Apr. 27, 1980    Hope, Inc. broke ground for two solar homes on Edgehill Avenue, the first to be constructed in an urban neighborhood for purchase by low-to-moderate-income families.
- ca. July 1980    Property owners in a large portion of the Belmont-Hillsboro Neighborhood received letters that the Belmont-Hillsboro Historic

District has been placed on the National Register of Historic Places.

- Sept. 12, 1981 The tenth anniversary of BHN, and incidentally, national Neighborhood Day as well, was celebrated at the neighborhood fair. Recognition was given to residents who had lived in the neighborhood for 25 years, and 50-year residents received life memberships. Several other neighborhood organizations were represented at the event.
- ca. Aug. 1982 Construction on I-440 (also known as Four-Forty Parkway) began with surface clearing, tree cutting, and the beginning of excavation.
- Sept. 18, 1982 Belmont-Hillsboro Neighbors and Sunnyside Community Citizens held a joint neighborhood fair to celebrate their achievements and combine the best of their talents. The fair was held in Sevier Park.
- Aug. 27, 1983 A number of neighbors took the bus trip to the March on Washington, and several of them received extensive press coverage. Among them were Fred Cloud, Frank Cuthbertson, Mary Drew, Terry Huff, Claire Sullivan, and DeLois Wilkinson.
- ca. Sept. 1984 During the fall months, actress Jessica Lange, her daughter Shura, and Sam Shepard lived in the Belmont-Hillsboro neighborhood, at 2203 Oakland Avenue. They were in Nashville for the filming of "Sweet Dreams," a film about the life of country music singer Patsy Cline. A number of neighbors worked for a day or two as extras.
- Apr. 3, 1987 The completion of Interstate 440 with its six interchanges was officially opened in a ribbon-cutting ceremony by Gov. Ned McWherter and Mayor Richard Fulton in the eastbound lanes of the parkway between Belmont Boulevard and Brightwood Avenue bridges.
- 1993 A Metro ordinance permitting and regulating bed and breakfast facilities in historic homes is enacted: BHN has two of the first three.
- Apr. 8, 2005 Belmont-Hillsboro became a Neighborhood Conservation Zoning Overlay district, to protect the architectural character and diversity of homes in the neighborhood.

### **Biographical/Historical Sketch**

The Belmont-Hillsboro Neighbors, Inc. is a non-profit organization that was founded circa 1970 and has the distinction of being the longest continually operating neighborhood entity in Nashville, Tennessee. This citizens advocacy group was founded by neighborhood residents and new arrivals interested in preserving the residential character of the neighborhood, retaining the diversity of the area, and encouraging friendly connections in a "racially, economically and socially integrated" residential community. The neighborhood is located south of downtown Nashville, Tennessee in an

urban community in close proximity to Belmont University, Vanderbilt University, Sevier Park, hospitals, shopping facilities and transportation bus lines.

In the 19<sup>th</sup> century, the area had once been part of the estates of Adelia Acklen (Belmont) and Colonel A. B. Montgomery. The oldest sections of the neighborhood were subdivided in the early 1890s and in 1901, when the Belmont Land Company secured a franchise to operate a street railway along Belmont Boulevard, advancing the development of the area as a “street car suburb.” In the 1940s, the neighborhood suffered a decline as cars replaced the street cars and the suburbs of Nashville continued its outward expansion.

Circa 1970, the residents in the neighborhood were facing several problems such as absentee landlords, housing code violations, inadequate services from the city, deteriorating housing conditions, and real estate exploitation. In addition to these concerns, the question of school desegregation was an important issue for the organization.

In August, 1970 several Belmont-Hillsboro neighbors were actively involved in Citizens for Unitary Education (CUE) when school desegregation became a major issue in Nashville. Eugene TeSelle and other activists planned a neighborhood mass meeting, held on September 25, 1970, with a purpose to “meet your neighbors and talk about ways to deal with our common concerns: stable, integrated schools and neighborhoods; home rehabilitation; urban renewal; zoning for commercial use and multiple dwellings.” The next neighborhood mass meeting was held on October 23, 1970 when John Gattis, Director of the Fair Housing Foundation, was invited to speak to the group. In 1971, Belmont-Hillsboro Neighbors became affiliated with National Neighbors, an organization of interracial organizations, promoting an agenda for successful interracial living.

In 1973, the organization had grown to approximately two hundred members and was represented by Susan F. Wiltshire, head of the Steering Committee. In addition to the neighborhood preservation projects and developing organizational goals, they sponsored the Belmont-Hillsboro “Neighborhood Fair.” On May 14, 1973, the Steering Committee voted unanimously to participate as a co-sponsoring group in the Title I “Neighborhood Workshops on Zoning and Land Use Planning.”

For several years, Belmont-Hillsboro Neighbors was opposed to the construction of I-440, also known as Four-Forty Parkway. At its annual meeting in October, 1976, the citizen action group voted unanimously to oppose construction of the interstate highway that would eventually cut through the urban landscape and affect the neighborhood. I-440, with its six interchanges, was officially opened in a ribbon-cutting ceremony by Governor Ned McWherter and Mayor Richard Fulton in the eastbound lanes of the parkway between Belmont Boulevard and Brightwood Avenue bridges on April 3, 1987.

In May of 1976, the organization received the award for neighborhood organizations at the Metropolitan Historical Commission's annual Architectural Awards Program "for

creating viable relationships and recognizing and preserving the best qualities of a neighborhood."

In 1980, several property owners in a large portion of the Belmont-Hillsboro Neighborhood received letters that the Belmont-Hillsboro Historic District had been placed on the National Register of Historic Places, most notably for the architecture of early 20th century bungalows, foursquares and tudors.

In the 21st century, the Belmont-Hillsboro Neighborhood Conservation Zoning Overlay, passed by Metro Council in April of 2005 and signed by Mayor Bill Purcell, to protect the architectural character and diversity of homes in the neighborhood.

### **Scope and Contents of the Collection**

The collection consists of documentary resources either collected or produced by the Belmont-Hillsboro Neighbors, Inc. spanning the dates circa 1970 through circa 1988. The materials include publications, newsletters, topical files, correspondence, photographs, and miscellany. The topical coverage relates to suburban development, transportation, housing markets, urbanization, school integration and busing, integrated education, and land use policy planning for Nashville-Davidson County. The organizational records pertain to the citizen advocacy group's planning initiatives, community development, I-440 public hearings, interracial neighborhood, public policy, education, and the organization's activities such as the street fair.

### **Organization/Arrangement of Materials**

The collection is organized into five series.

**Series I.** Publications.

**Series II.** Topical files

**Series III.** Newsletters and Miscellany

**Series IV.** Correspondence

**Series V.** Photographs

#### **Arrangement:**

Each series is arranged in alphabetical order, except for Series I. Publications, which is arranged in chronological order.

### **Restrictions**

**Restrictions on Access:** In library use only. Available by appointment.

**Restrictions on Use and Reproduction:** This material may be protected by copyright (Title 17 U.S. Code).

### **Index Terms**

**Personal Names:**

TeSelle, Eugene, 1931-  
McFague, Sallie  
Wiltshire, Susan Ford, 1941-  
Bourg, Carroll J.  
Myers, J. William (James William), 1940-

**Corporate Names/Organizations:**

Belmont-Hillsboro Neighbors, Inc. (Nashville, Tenn.)  
Nashville Metropolitan Council

**Subjects:**

Architecture, Domestic--Tennessee--Nashville  
City planning--Tennessee--Nashville  
Community development, Urban--Tennessee--Nashville  
Discrimination in housing--Tennessee--Nashville  
Dwellings--Tennessee--Nashville  
Ethnic relations--Tennessee--Nashville  
Express highways--Tennessee--Nashville  
Express highways--Tennessee--Nashville Metropolitan Area  
Land use--Tennessee--Davidson County  
Metropolitan areas--Tennessee--Nashville  
Minorities--Tennessee--Nashville  
Neighborhood--Tennessee--Nashville  
Neighborhood government--Tennessee--Nashville  
Neighborhood planning--Tennessee--Nashville  
Non-governmental organizations--Tennessee--Nashville  
Nonprofit organizations--Tennessee--Nashville  
Race relations--Tennessee--Nashville  
Regional planning--Tennessee--Nashville Metropolitan Area  
Rural-urban migration--Tennessee--Nashville  
Social change--Tennessee--Nashville  
Social service and race relations--Tennessee--Nashville  
Suburban life--Tennessee--Nashville  
Transportation, Automotive--Tennessee--Nashville  
Urban renewal--Tennessee--Nashville  
Urban transportation--Tennessee--Nashville  
Urbanization--Tennessee--Nashville  
Women in nonprofit organizations--Tennessee--Nashville  
Zoning, Exclusionary--Tennessee--Nashville

**Places:**

Belmont-Hillsboro (Nashville, Tenn.)  
Belmont Boulevard (Nashville, Tenn.)  
Hillsboro Pike (Davidson County, Tenn.)  
Nashville (Tenn.)--History--Sources  
Nashville (Tenn.)--Ethnic relations

Nashville (Tenn.)--Race relations  
Nashville (Tenn.)--Social conditions  
Nashville (Tenn.)--Social life and customs  
Nashville and Davidson County (Tenn.)--History

**Genre/Document Types:**

Clippings  
Photographs  
Ephemera  
Correspondence  
Publications  
Newsletters  
Directories

**Associated and Related Material**

Available in the Special Collections Division is a collection "Multiple listing service, 1968-1971" which contains a few examples related to property in the Belmont-Hillsboro neighborhood. It includes cards describing various real estate properties for sale in Middle Tennessee, 1968-1971, created as a multiple listing service by the Nashville Board of Realtors. A finding aid is available in the repository.

**Administrative Information**

**Copyright:** This material may be protected by copyright law (Title 17 U.S. Code).

**Preferred Citation:** Belmont-Hillsboro Neighbors, Inc. Records, Special Collections Division, Nashville Public Library.

**Immediate Source of Acquisition:** Donated to the Special Collections Division, Nashville Public Library by David I. McWhirter, on July 23, 2002 (Acc. 2002.002)

**Ownership and Custodial History:** In possession of David I. McWhirter at time of donation. McWhirter was the president of Belmont-Hillsboro Neighbors, ca. 1979-1980.

**Processing Information:** Processed by Leanne Garland in February, 2007.

**Accruals:** No further accruals are expected.

**References to Works by or about Collection Creator/Topic**

The Belmont-Hillsboro, Inc. maintains an Internet website (<http://www.belmont-hillsboro.org/>) that provides additional information about the neighborhood organization.

Related book: *Building a Neighborhood: Yesterday, Today, Tomorrow*. Nashville, Tenn., 1975. Location: Call nr. 711.4 B932, Nashville Rm., Tenn.

**Detailed Description of the Collection**

**Series I. Publications, ca. 1970-ca. 1979, 2.0 cu. ft. (4 boxes)**

**Series Abstract/Description**

This series consists of various publications, many of which were produced by the Metropolitan Government of Nashville and Davidson County during the 1970s. Includes published studies and reports on topics such as suburban development, the housing market, capital improvements budget and program, land use policy, central business district analysis and design planning, transportation, neighborhood resources, and urban renewal.

**Arrangement**

Arranged chronologically.

**Container List**

**Box 1 of 4 (in the series)**

**1970-1973**

- f. 1 Consumer Handbook. Published by Law Students Civil Rights Research Council, Vanderbilt University School of Law, Nashville, Tennessee, 1970.
- f. 2 Analyzing Suburban Development. Planning Commission Metropolitan Government of Nashville and Davidson County, Tennessee. February, 1973.
- f. 3 An Analysis of the Nashville Housing Market. Planning Commission, Metropolitan Government of Nashville and Davidson County, Tennessee. September, 1973.
- f. 4 A Summary of an analysis of the Nashville Housing Market. Planning Commission, Metropolitan Government of Nashville and Davidson County, Tennessee. September, 1973.
- f. 5 Capital Improvements Budget and Program: 1973-74 through 1978-79. Metropolitan Government of Nashville and Davidson County, Tennessee. November, 1973.

**Box 2 of 4 (in the series)**

**1974-1975**

- f. 1 Land Use Policy Plan for Nashville-Davidson County, Tennessee. Planning Commission, Metropolitan Government of Nashville and Davidson County, Tennessee. February, 1974 (3<sup>rd</sup> printing).
- f. 2 Capital Improvements Budget and Program: 1974-75 through 1979-80. Metropolitan Government of Nashville and Davidson County, Tennessee. September, 1974.
- f. 3 Central Business District: Analysis and Design Plan. Planning Commission Metropolitan government of Nashville and Davidson County, Tennessee. October, 1975.

**Box 3 of 4 (in the series)**

**1976-1977**

- f. 1 Unemployment in a South in Recession: A Special Report. The Southern Regional Council. February, 1976.
- f. 2 Capital Improvements Budget and Program 1976-77 through 1981-82. Metropolitan Government of Nashville and Davidson County, Tennessee. September, 1976.
- f. 3 Proposed General Plan for Nashville: Summary of Three Alternatives. Planning Commission, Metropolitan Government of Nashville and Davidson County, Tennessee. January, 1977.
- f. 4 Nashville Urban Area Transportation Study: 1976 Summary Report. Prepared for Joint Transportation Planning Program of Metropolitan Nashville and Davidson County, Tennessee. By the Metropolitan Planning Commission, Metropolitan Government of Nashville and Davidson County, Tennessee. June, 1977.
- f. 5 Capital Improvements Budget and Program, 1977-78 – 1982-83. Metropolitan Government of Nashville and Davidson County, Tennessee. August, 1977.

**Box 4 of 4 (in the series)**

**1977 (continued)**

- f. 1 Nashville Urban Area Transportation Study Annual Transportation Report for 1977. Prepared for the Joint Transportation Planning Program of Metropolitan Nashville and Davidson County, Tennessee. October, 1977.

**1978**

- f. 2 Neighborhood Resources and Information Center. Prepared by Valeriano Saucedo, Assisted by Maria G. Palacios, National Economic Development Law Project, Berkeley California, May, 1978.
- f. 3 MTA/MPC Index of Transportation Services for Special Groups in Nashville, Davidson County, Tennessee. Prepared by the Metropolitan Transit Authority, February 8, 1978.
- f. 4 Preliminary Evaluations of Alternatives to Serve the Crosstown Travel Desires in South Nashville. Prepared by the Environmental Planning Division of the Bureau of Planning and Programming Tennessee Department of Transportation. February, 1978.
- f. 5 Land Use Analysis, Metropolitan Nashville-Davidson County, Tennessee: A Summary. September, 1978.
- f. 6 Central Transfer Feasibility Study Interim Report, Prepared for the Central Transfer Feasibility Study Citizens Committee, by the Staff of the Metropolitan Planning Commission and the Metropolitan Transit Authority, November, 1978.

**1979**

- f. 7 Staff Memorandum Community Development Citizens Orientation Workshop. Prepared by Metropolitan Planning Commission Metropolitan Government of Nashville and Davidson County, Tennessee. February, 1979.
- f. 8 Transportation Plan for the Elderly and Handicapped Citizens of Nashville-Davidson County. A Joint Report by the Metropolitan Transit Authority and Metropolitan Planning Commission, Feb. 23, 1979.
- f. 9 Draft for Review Long-Range Transit Plan: Nashville Area Transit Improvement Plan. Barton-Aschman Associates, Inc., Evanston, Illinois, March, 1979.

- f. 10 Understanding Citizens' Power in Transportation Planning. The Metropolitan Government of Nashville and Davidson County, Tennessee, Metropolitan Planning Organization of the Nashville Urban Area, ca. 1979 (2 copies)

**n.d. (not dated)**

- f. 11 Preliminary Development Plan: 1972-2000 for the Mid-Cumberland region of Tennessee. repared by the Mid-Cumberland Council of governments and Mid-Cumberland Development District.

**Series II. Topical Files, ca. 1970-ca. 1977, 1.0 cu. ft. (2 boxes)**

**Series Abstract/Description**

This series consists of topical research files about housing codes, Citizens for Better Neighborhoods, I-440 Environmental Impact hearings, zoning regulations and codes, fair housing, Metropolitan Planning Commission, school busing, National Neighbors Conference (1974), open housing, and the governing officers of Belmont-Hillsboro Neighbors (BHN). Includes some of the correspondence of Carroll J. Bourg and Susan F. Wiltshire, Chairpersons of the Steering Committee, among others. Also present in the collection are two separate studies of the Belmont-Hillsboro Neighbors (BHN) conducted in the early 1970s by representatives from the Center for Community Studies at George Peabody College and the Urban Community.

**Arrangement**

Arranged alphabetically.

**Container List**

**Box 1 of 2 (in the series)**

- f. 1 Belmont-Hillsboro Neighbors, 1973-1974
- f. 2 Belmont-Hillsboro Neighbors-Finances, March 12, 1973
- f. 3 Belmont-Hillsboro Neighbors-Housing Code, Oct. 1971
- f. 4 Citizens for Better Neighborhoods, ca. 1975-1977
- f. 5 COMZO-Natural Land Use, ca. 1973-1974
- f. 6 Fair Housing Foundation and Legal Cases, ca. 1970-ca. 1971
- f. 7 Hazelwood Property, 1973-1974
- f. 8 I-440
- f. 9 Membership Blanks-Mailing Lists, n.d.
- f. 10 Metro Planning Commission-University Center, Sept. 1973

**Box 2 of 2 (in the series)**

- f. 1 Nashville School Situation, ca. 1970-1973
- f. 2 National Neighbors, Atlanta, June 6-9, 1974
- f. 3 Neighborhood Fair (Belmont-Hillsboro Fair), 1972-1973

- f. 4 Neighborhood Service (HUD, Metro, BHN), ca. 1974
- f. 5 Newsclippings, ca. 1971-1974
- f. 6 Other Local Housing Groups, ca. 1972-1973
- f. 7 Peabody Study, 1973-1974
- f. 8 Sociological Study of BHN "Preserving Old Neighborhoods: A Study of Two Nashville Neighborhoods" by Lillian Ellis, 1973
- f. 9 Sponsors of Open Housing Investment (SOHI), ca. 1970-1974
- f. 10 Steering Committee, n.d.
- f. 11 Steering Committee Constitution & By-laws, Correspondence, ca. 1973
- f. 12 Steering Committee Meeting, July 11, 1977
- f. 13 21<sup>st</sup> and Fairfax, ca. 1973
- f. 14 Zoning Issues-Codes, ca. 1971

**Series III. Newsletters and Miscellany, 1971-1988, .5 cu. ft. (2 boxes)**

**Series Abstract/Description**

This series of newsletters, brochures, and miscellany. The topical coverage includes urban homesteading, neighborhood revitalization, equal opportunity in housing, promotion and marketing techniques, Federal National Mortgage Association, National Association of Neighborhoods (NAN), and multi-racial neighborhoods. The collection contains several newsletter issues of "Belmont-Hillsboro News" and "National Neighbors," a bi-monthly publication on interracial living.

**Arrangement**

Arranged alphabetically.

**Container List**

**Box 1 of 2 (in the series)**

- f. 1 Belmont-Hillsboro Neighborhood directory and brochure, ca. 1977
- f. 2 Belmont-Hillsboro News, ca. 1976-1987
- f. 3 Brochures and miscellany, ca. 1974-1988
- f. 4 Federal National Mortgage Association, 1977
- f. 5 National Association of Neighborhoods, ca. 1976-1977
- f. 6 National Neighbors, ca. 1971-ca. 1973
- f. 7 National Neighbors, ca. 1974-ca. 1977
- f. 8 Southern Neighborhoods, March/April, 1979

**Box 2 (in the series) Note: A wrapped flat-panel enclosure.**

- f. 1 Various posters for annual meeting and Neighborhood Fair

**Series IV. Correspondence, ca. 1972-ca. 1977, .25 cu. ft. (1 box)**

**Series Abstract/Description**

This series consists primarily of correspondence of several officers of Belmont-Hillsboro Neighbors: Carroll J. Bourg, John William Myers, Jr.,

Eugene TeSelle, and Ashley T. Wiltshire, Jr. Includes some miscellaneous correspondence.

**Arrangement**

Arranged alphabetically.

**Container List**

**Box 1 of 1 (in the series)**

- f. 1 Bourg, Carroll J., ca. 1973-1974
- f. 2 Miscellaneous, ca. 1976-1977
- f. 3 Myers, J. William (Jr.), 1977
- f. 4 Wiltshire, Ashley T. (Jr.), ca. 1976-1977.

**Series V. Photographs, ca. 1970s, .25 cu. ft. (1 box)**

**Series Abstract/Description**

This series of 59 black & white photographs depict the Belmont-Hillsboro neighborhood during the 1970s. Includes various views of homes, yards, and the "Neighborhood Fair."

**Arrangement**

Arranged alphabetically.

**Container List**

**Box 1 of 1 (in the series)**

- f. 1 Neighborhood Photographs, ca. 1970s (26 items, prints)
- f. 2 Neighborhood Fair (Belmont-Hillsboro), ca. 1972 (33 items, prints)
- f. 3 Neighborhood Fair (Belmont-Hillsboro), ca. 1972 (11 strips, negatives)
